# Supplementary material for: Maximum thermal limits of coral reef damselfishes are size-dependent and resilient to near-future ocean acidification
Source: Oxford University Press journal article supplement (doi:10.1242/jeb.162529), 2017-01-01
Supplement: jeb162529supp.pdf [file jeb162529supp.pdf]

## Supplementary figures

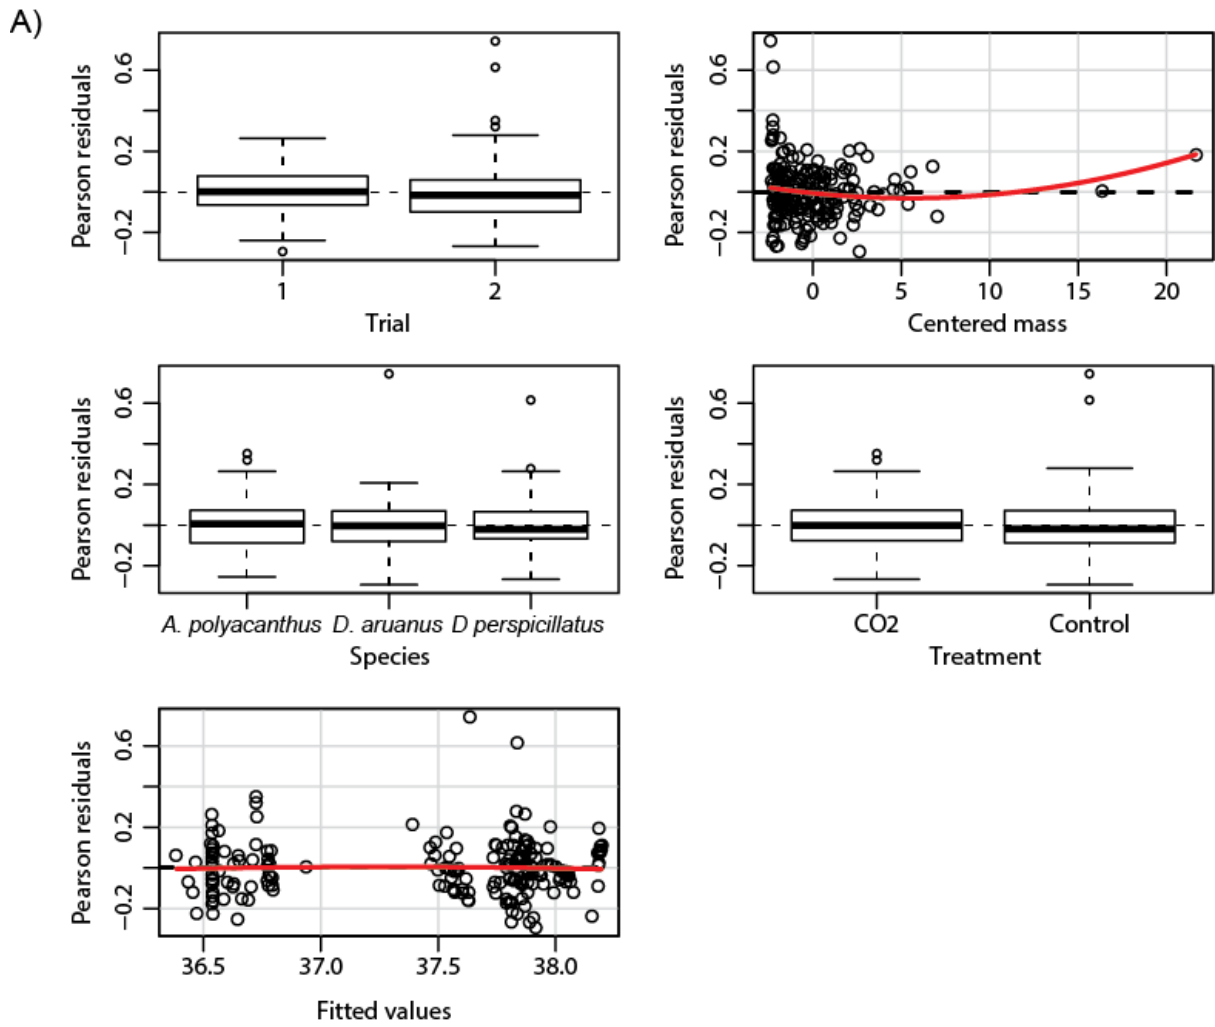

Fig. S1A

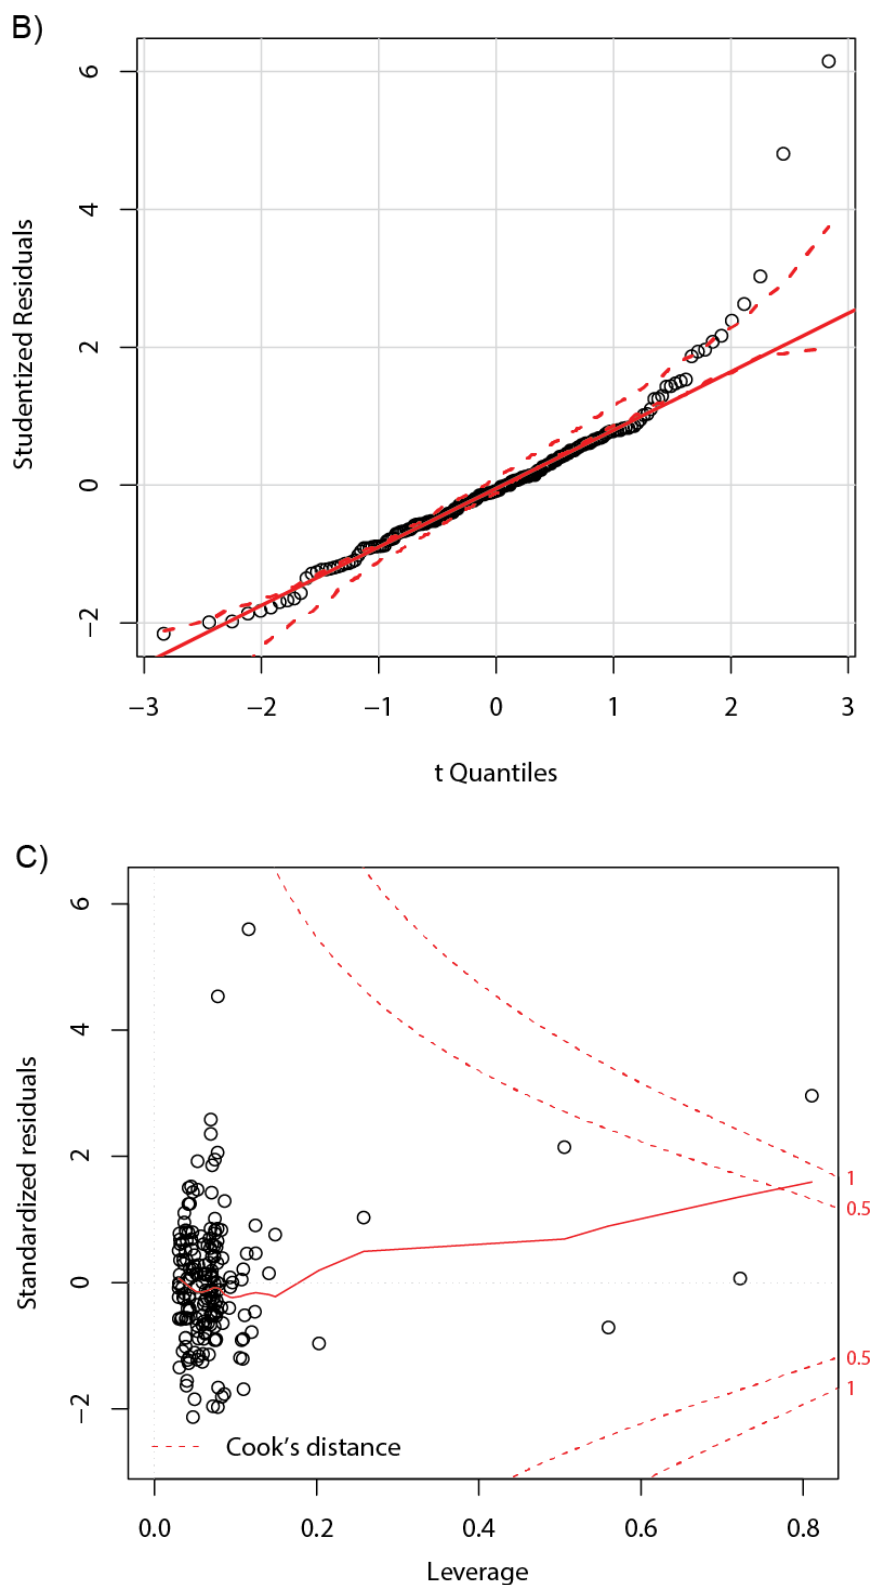

Figs. S1B, S1C

**Fig. S1** Diagnostic plots showing the distribution of residuals from the model  $CT_{\max} \sim (\text{trial} + \text{mass} + \text{species} + \text{treatment})^2$  to assess (A) homoscedasticity (i.e., homogeneity of variance), (B) normality (via a quantile-quantile plot), and (C) leverage (i.e., the influence of values on model output). All data points were included in the model. T1 and T2 represent the two separate trials. For a discussion of these diagnostic plots and reasons for excluding data points from general linear models, see Kim (2015) and Prabhakaran (2016).

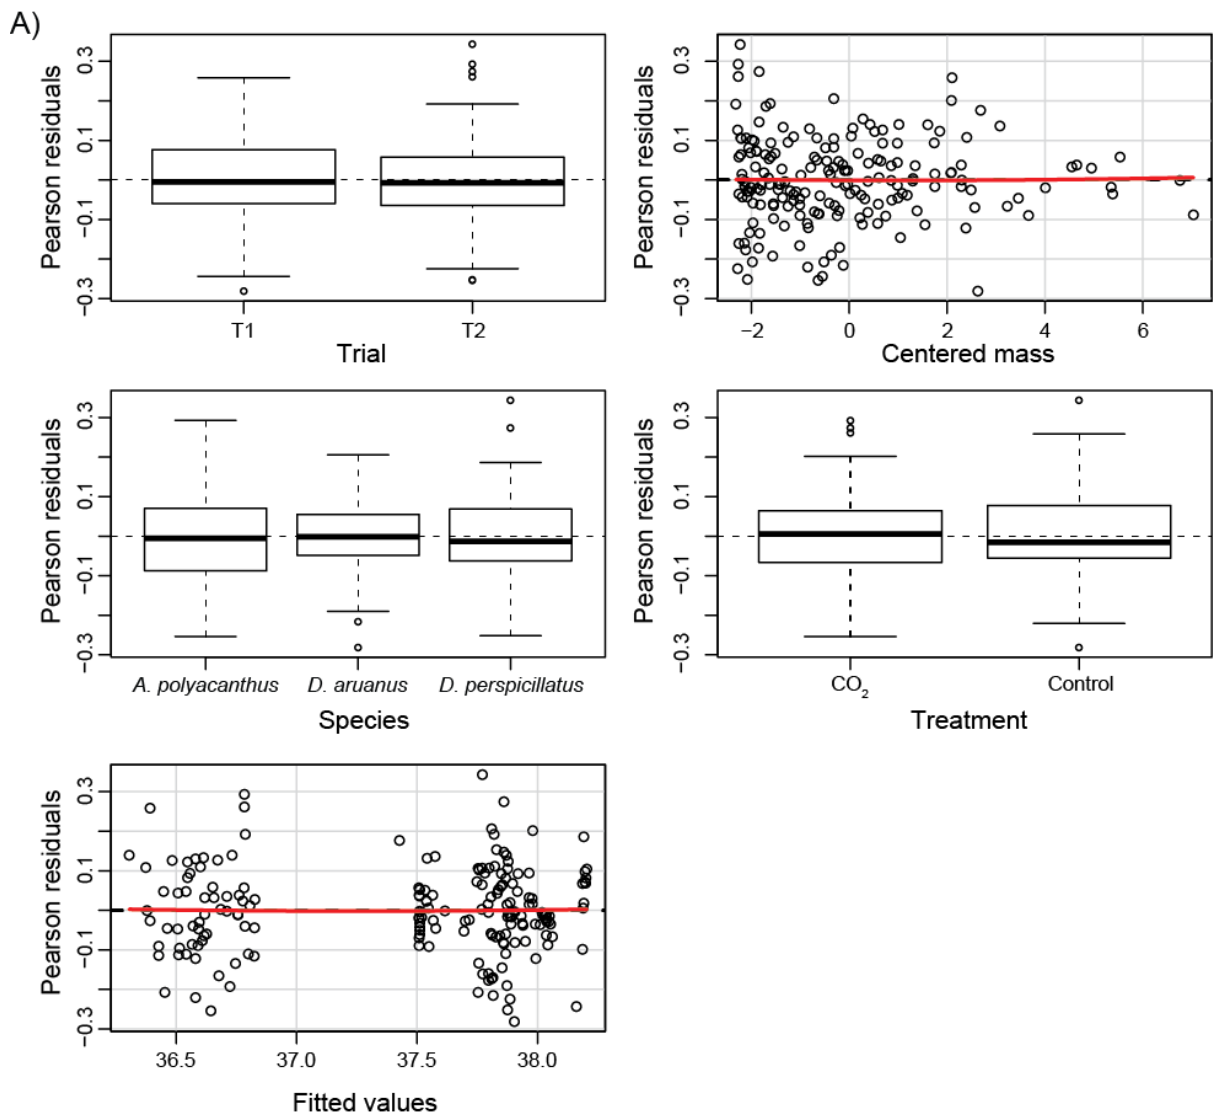

Fig. S2A

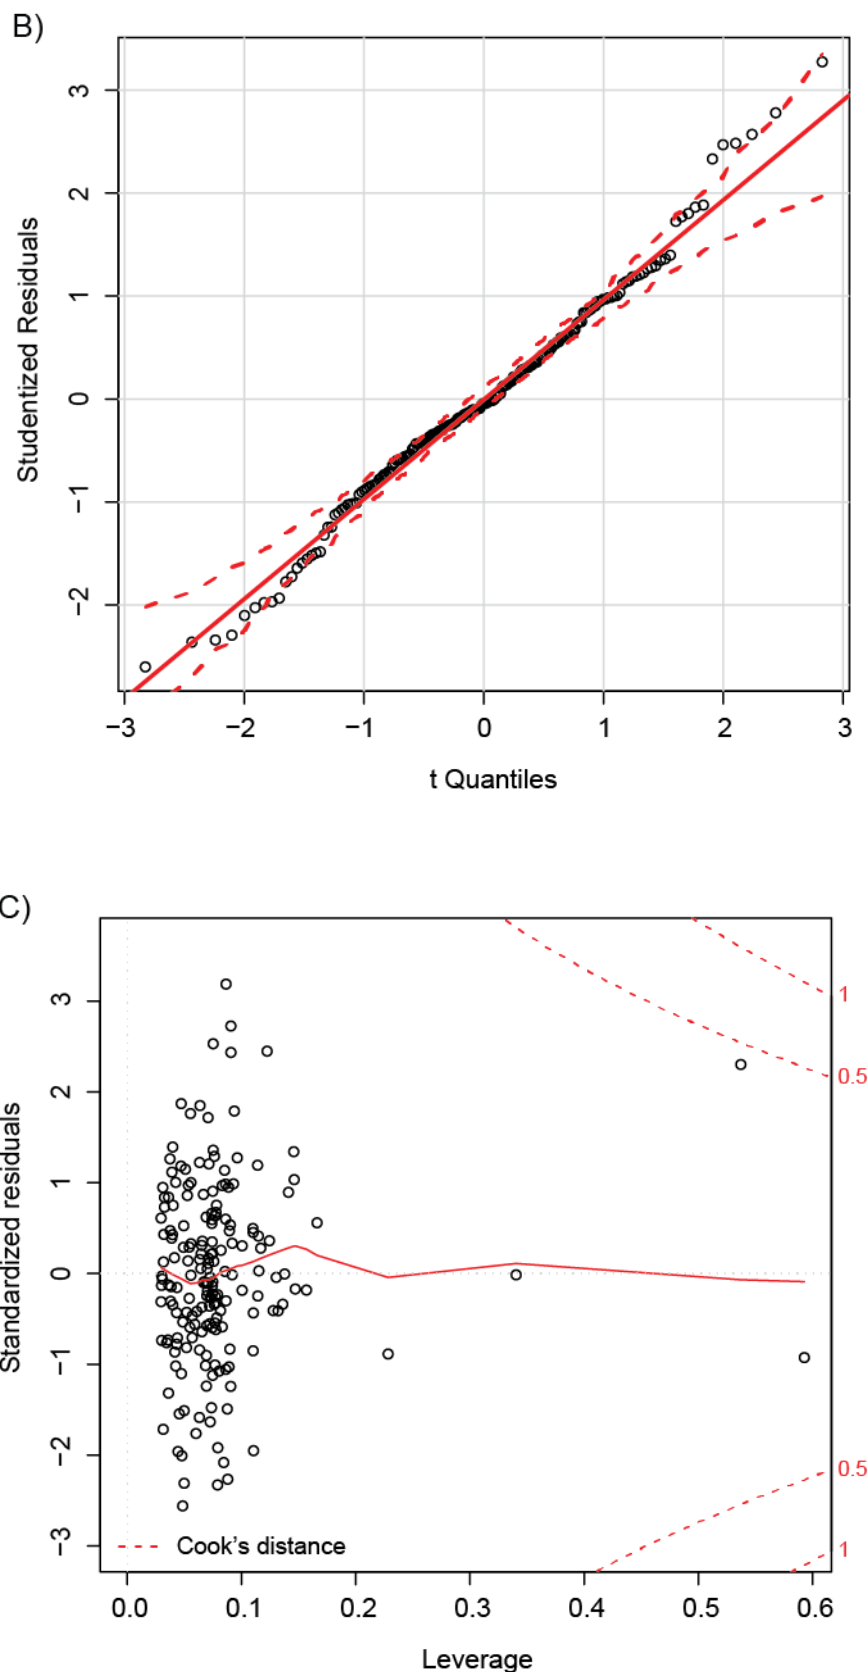

Figs. S2B, S2C

**Fig. S2** Diagnostic plots showing the distribution of residuals from the model  $CT_{\max} \sim (\text{trial} + \text{mass} + \text{species} + \text{treatment})^2$  to assess (A) homoscedasticity (i.e., homogeneity of variance), (B) normality (via a quantile-quantile plot), and (C) leverage (i.e., the influence of values on model output). *Five outliers were excluded from the model* (identified as dotted green circles in Figs. 2, 3 and S3). T1 and T2 represent the two separate trials.

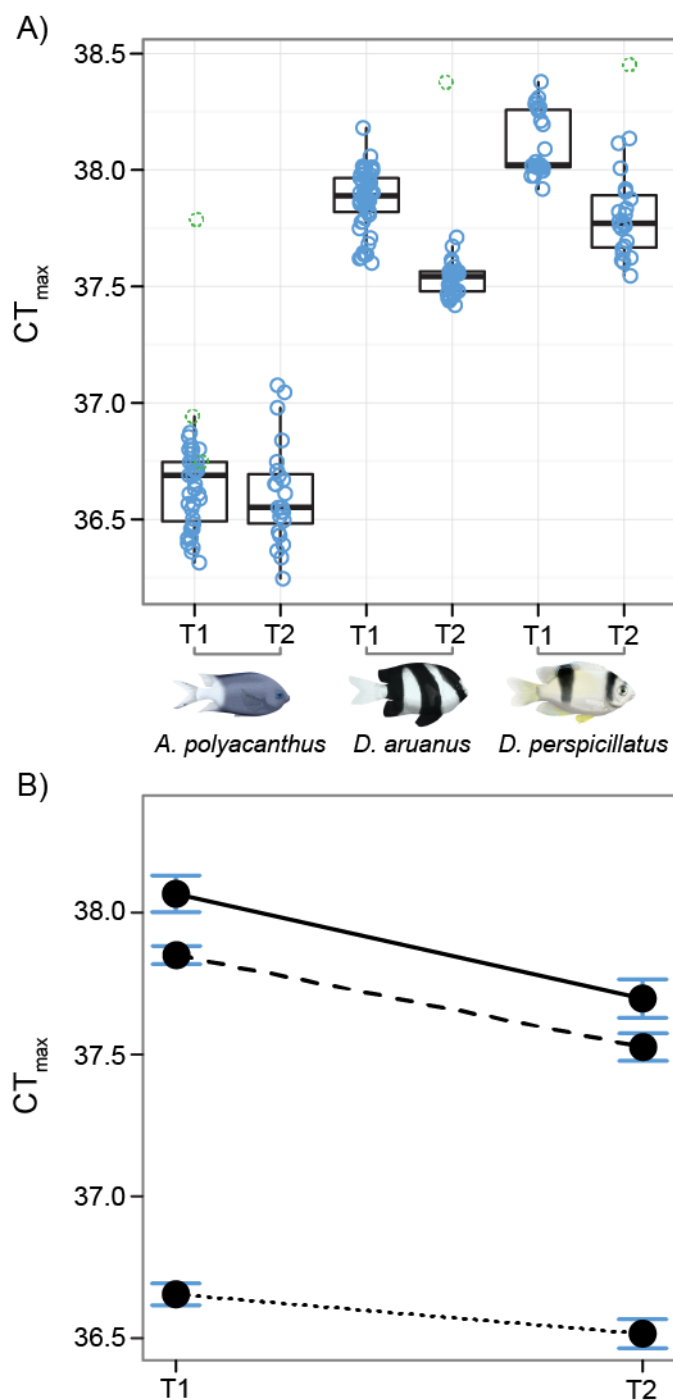

Fig. S3

**Fig. S3**  $CT_{max}$  of three damselfish species across two trials (T1 and T2). (A) Box-and-whisker plots showing the distribution of the raw data with five outliers (excluded from the model) indicated with dotted green circles. (B) Model predictions for *A. polyacanthus* (dotted line), *D. aruanus* (dashed line) and *D. perspicillatus* (solid line). Error bars are 95% confidence intervals.

## References

**Kim, B.** (2015). Understanding diagnostic plots for linear regression analysis.

University of Virginia Library <http://data.library.virginia.edu/diagnostic-plots/>

**Prabhakaran, S.** (2016). Outlier detection and treatment with R. R-bloggers

<https://www.r-bloggers.com/outlier-detection-and-treatment-with-r/>
